# Supplementary material for: Interconnected honeycomb-like porous carbon derived from plane tree fluff for high performance supercapacitors
Source: Royal Society of Chemistry journal article supplement (doi:10.1039/c6ta03826c), 2016-01-01
Supplement: c6ta03826c1.pdf [file c6ta03826c1.pdf]

## Supporting Information

### Interconnected honeycomb-like porous carbon derived from plane tree fluff for high performance supercapacitors

Yunqiang Zhang <sup>a</sup>, Xuan Liu <sup>b</sup>, Shulan Wang <sup>a,\*</sup>, Shixue Dou <sup>c,\*</sup>, Li Li <sup>d,\*</sup>

<sup>a</sup> *Department of Chemistry, School of Science, Northeastern University, Shenyang, 110819, China.*

<sup>b</sup> *Department of Materials Science and Engineering, Carnegie Mellon University, Pittsburgh, PA, 15213, USA.*

<sup>c</sup> *Institute for Superconducting and Electronic Materials, University of Wollongong, Wollongong, NSW 2522, Australia.*

<sup>d</sup> *Department of Materials Science and Engineering, Cornell University, Ithaca, NY, 14850, USA.*

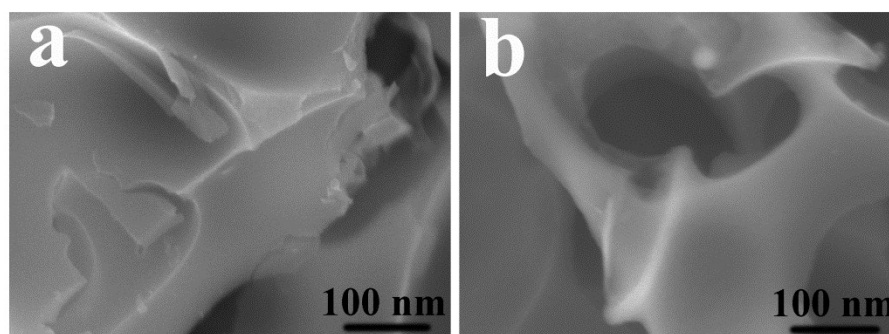

**Figure S1** SEM images of (a) HAC-800 and (b) IHPC-800.

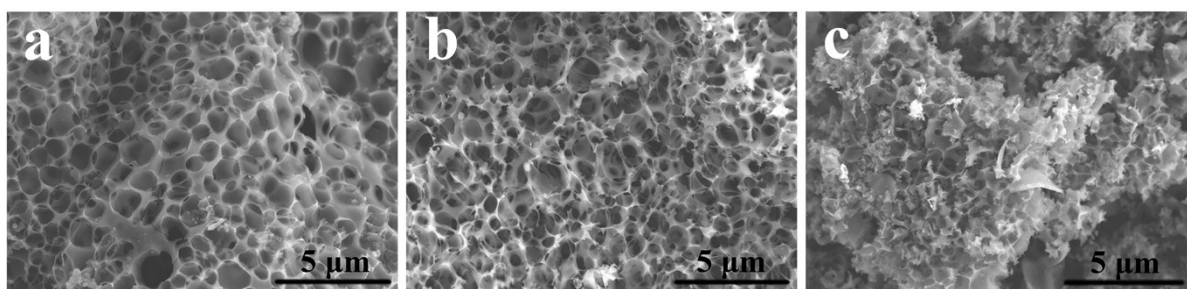

**Figure S2** SEM images of (a) IHPC-700, (b) IHPC-800, and (c) IHPC-900.

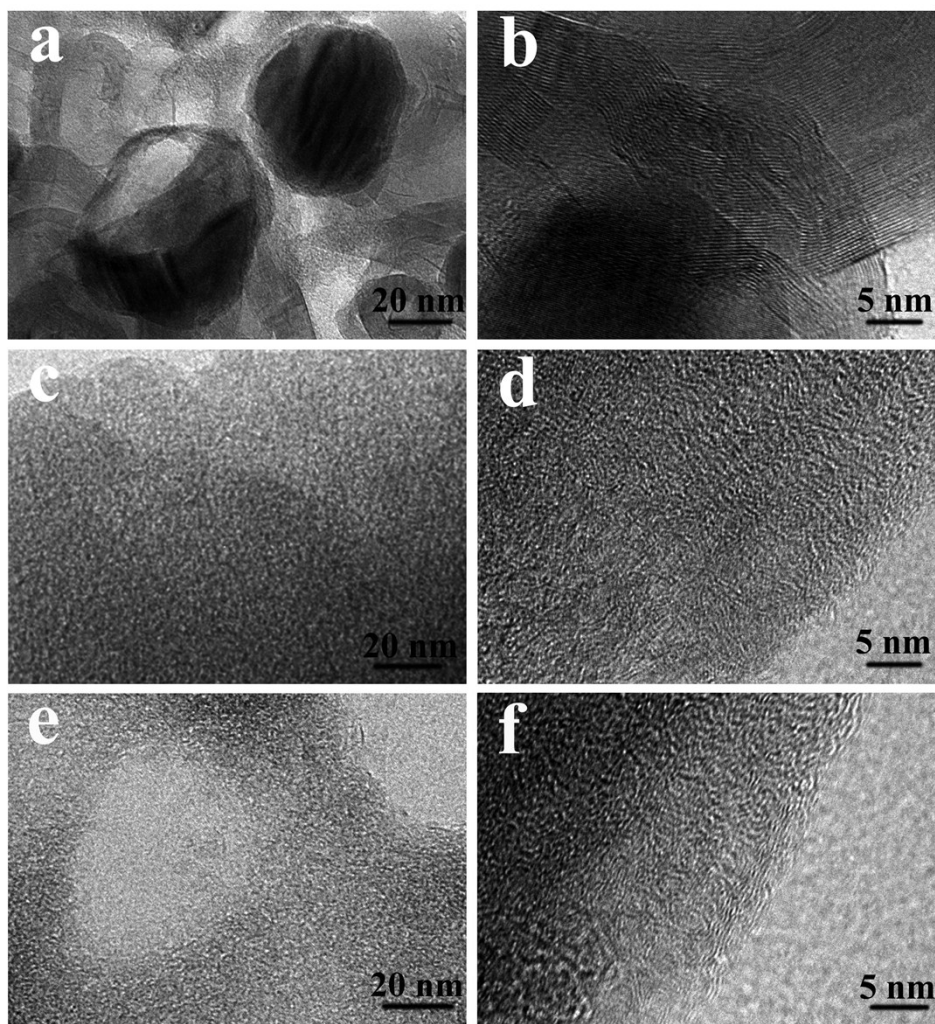

**Figure S3** High-resolution TEM images of (a, b) CT-800 without a post-etching process with HCl, (c, d) HAC-800, and (e, f) IHPC-800.

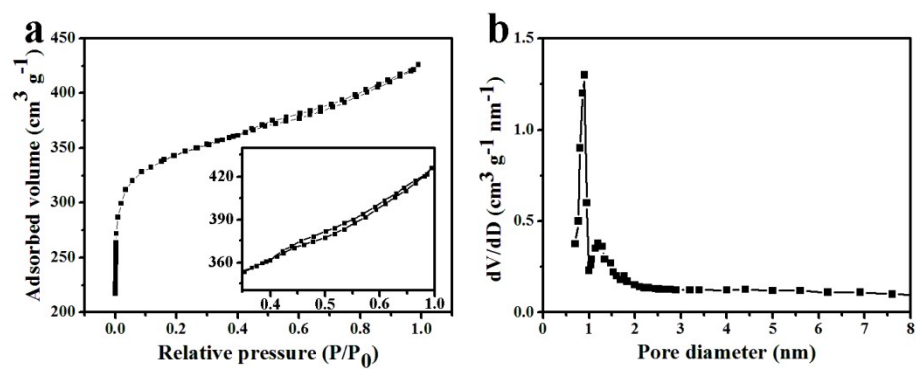

**Figure S4** (a)  $N_2$  adsorption and desorption isotherm, with an enlargement of the hysteresis loop as inset, and (b) pore size distribution of IHPC-800.

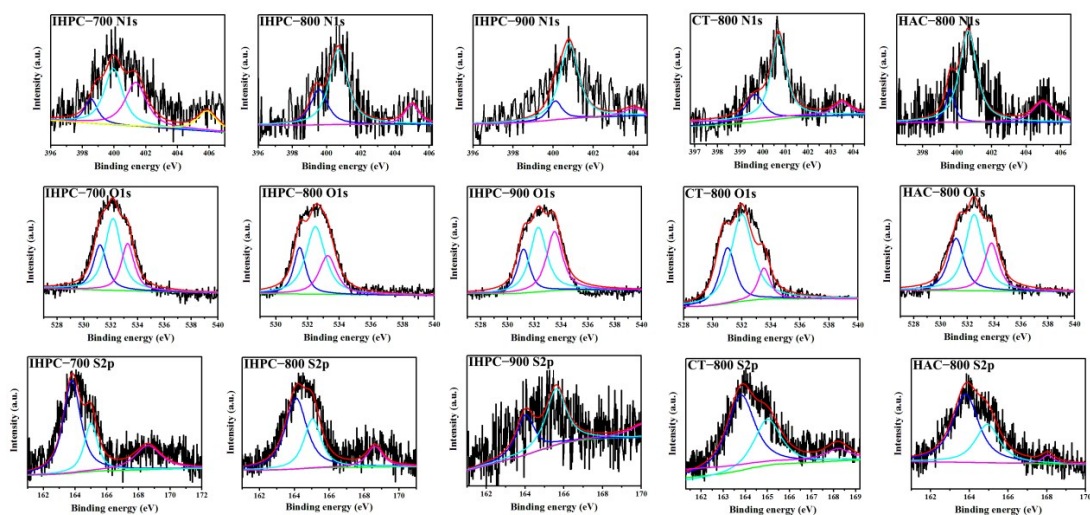

**Figure S5** High-resolution XPS scans for N1s, O1s, and S2p of the IHPC materials and control samples.

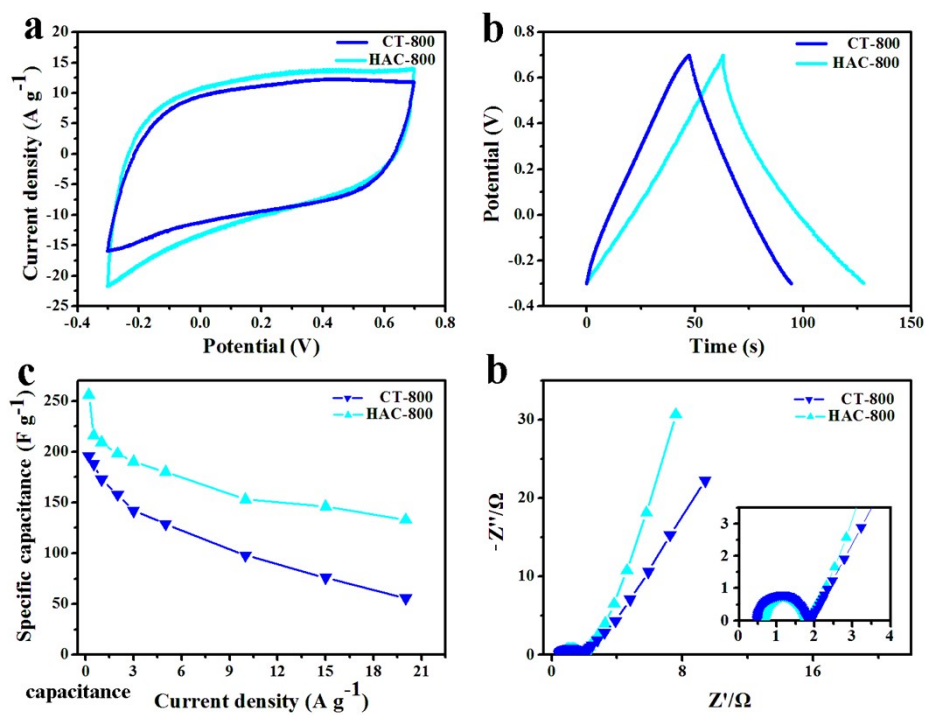

**Figure S6** Electrochemical performance of CT-800 and HAC-800 in a three-electrode cell in 2 M H<sub>2</sub>SO<sub>4</sub>. (a) CV curves at 50 mV s<sup>-1</sup>. (b) GCD curves at the current density of 3 A g<sup>-1</sup>. (c) Specific capacitance at different current densities. (d) Nyquist plots, with an enlargement of the high frequency region as inset.

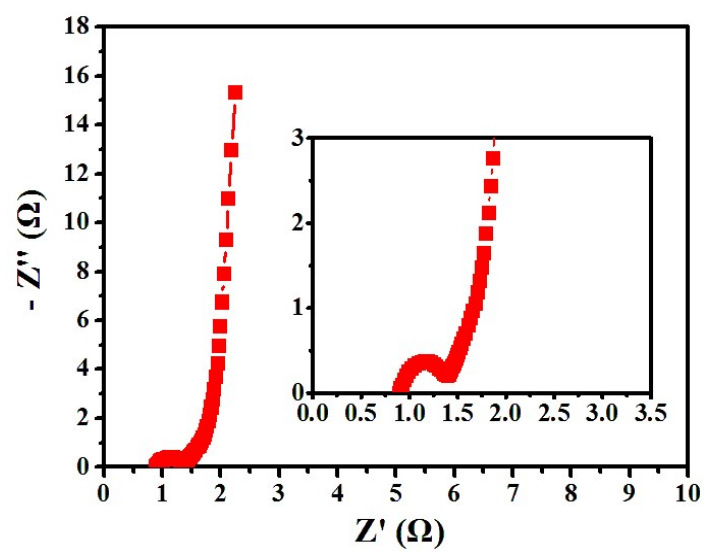

**Figure S7** Nyquist plot of IHPC-800 based symmetrical SCs in 2 M H<sub>2</sub>SO<sub>4</sub>, with an enlargement of the high frequency region as inset.

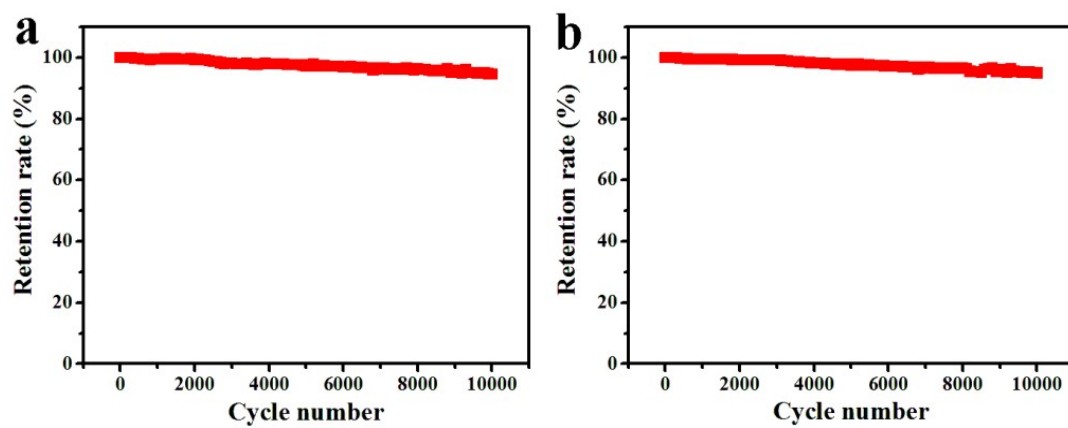

**Figure S8** Cycling stability of HIPC-800 based symmetrical SCs (a) in 2 M  $\text{H}_2\text{SO}_4$  ( $5 \text{ A g}^{-1}$ ) and (b) in 1 M  $\text{LiPF}_6$  in EC/DEC ( $2 \text{ A g}^{-1}$ ).

**Table S1** Comparison of the electrochemical performance of the as-prepared samples with other bio-derived carbon materials from recent references.

| Precursor     | $C_g$<br>(F g <sup>-1</sup> ) | Current density<br>(A g <sup>-1</sup> ) | Current density (A g <sup>-1</sup> )/cycle number/<br>$C_g$ retention (%) | References |
|---------------|-------------------------------|-----------------------------------------|---------------------------------------------------------------------------|------------|
| Willow catkin | 285                           | 1                                       | 5/10000/98                                                                | [S1]       |
| Human hair    | 340                           | 1                                       | 2/20000/98                                                                | [S2]       |
| Seed shell    | 329                           | 1                                       | -----                                                                     | [S3]       |
| Banana peel   | 206                           | 1                                       | 10/1000/98.3                                                              | [S4]       |
| Banana fibers | 74                            | 0.5                                     | 0.5/500/89                                                                | [S5]       |
| Pomelo peel   | 342                           | 0.2                                     | 10/1000/98                                                                | [S6]       |
| IHPC-700      | 410; 325                      | 0.2; 1                                  | 10/10000/96.10                                                            | This work  |
| IHPC-800      | 493; 370                      | 0.2; 1                                  | 10/10000/96.01                                                            | This work  |
| IHPC-900      | 395; 306                      | 0.2; 1                                  | 10/10000/97.30                                                            | This work  |
| CT-800        | 196; 173                      | 0.2; 1                                  | 10 /10000/97.02                                                           | This work  |
| HAC-800       | 256; 209                      | 0.2; 1                                  | 10/10000/95.20                                                            | This work  |

**Table S2** Equivalent series resistance ( $R_s$ ) and charge transfer resistance ( $R_{ct}$ ) of as-prepared samples in three-electrode cell.

| Samples  | $R_s$ ( $\Omega$ ) | $R_{ct}$ ( $\Omega$ ) |
|----------|--------------------|-----------------------|
| IHPC-700 | 0.56               | 0.61                  |
| IHPC-800 | 0.43               | 0.42                  |
| IHPC-900 | 0.45               | 0.76                  |
| CT-800   | 0.49               | 1.30                  |
| HAC-800  | 0.68               | 1.11                  |

## References

- [S1] Y. Li, G. Wang, T. Wei, Z. Fan and P. Yan, *Nano Energy*, 2016, **19**, 165-175.
- [S2] W. Qian, F. Sun, Y. Xu, L. Qiu, C. Liu, S. Wang and F. Yan, *Energy Environ. Sci.*, 2014, **7**, 379-386.
- [S3] A. Elmouwahidi, Z. Zapata-Benabithé, F. Carrasco-Marín and C. Moreno-Castilla, *Bioresour. Technol.*, 2012, **111**, 185-190.
- [S4] Y. K. Lv, L. Gan, M. Liu, W. Xiong, Z. Xu, D. Zhu and D. Wright, *J. Power Sources*, 2012, **209**, 152-157.
- [S5] V. Subramanian, C. Luo, A. M. Stephan, K. S. Nahm, S. Thomas and B. Q. Wei, *J. Phys. Chem. C*, 2007, **111**, 7527-7531.
- [S6] Q. Liang, L. Ye, Z.-H. Huang, Q. Xu, Y. Bai, F. Kang and Q.-H. Yang, *Nanoscale*, 2014, **6**, 13831-13837.
